# Supplementary figures and images for: Study on the Adsorption Performance of a Vortex Suction Cup under Varying Diameters of Underwater Structure Tubes
Source: MDPI journal article supplement (doi:10.3390/jmse12040662), 2024-04-17

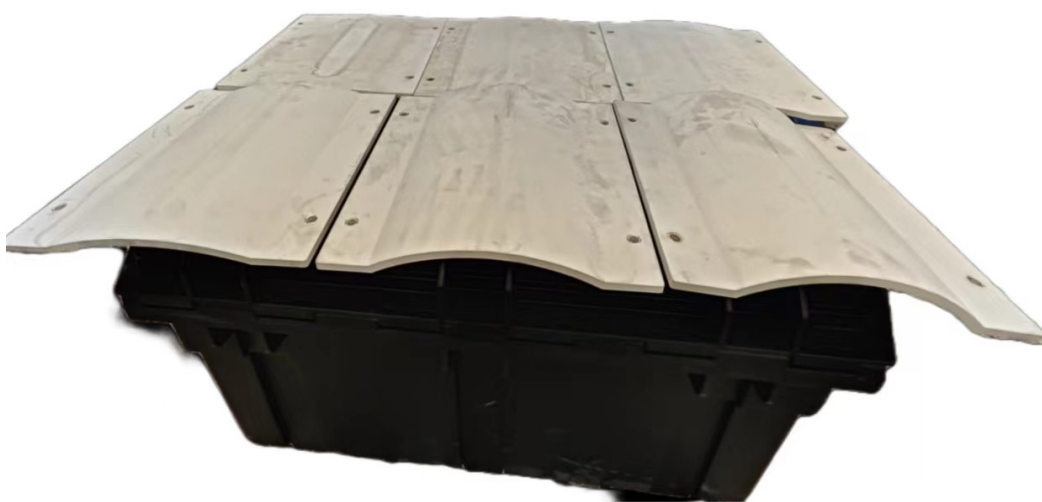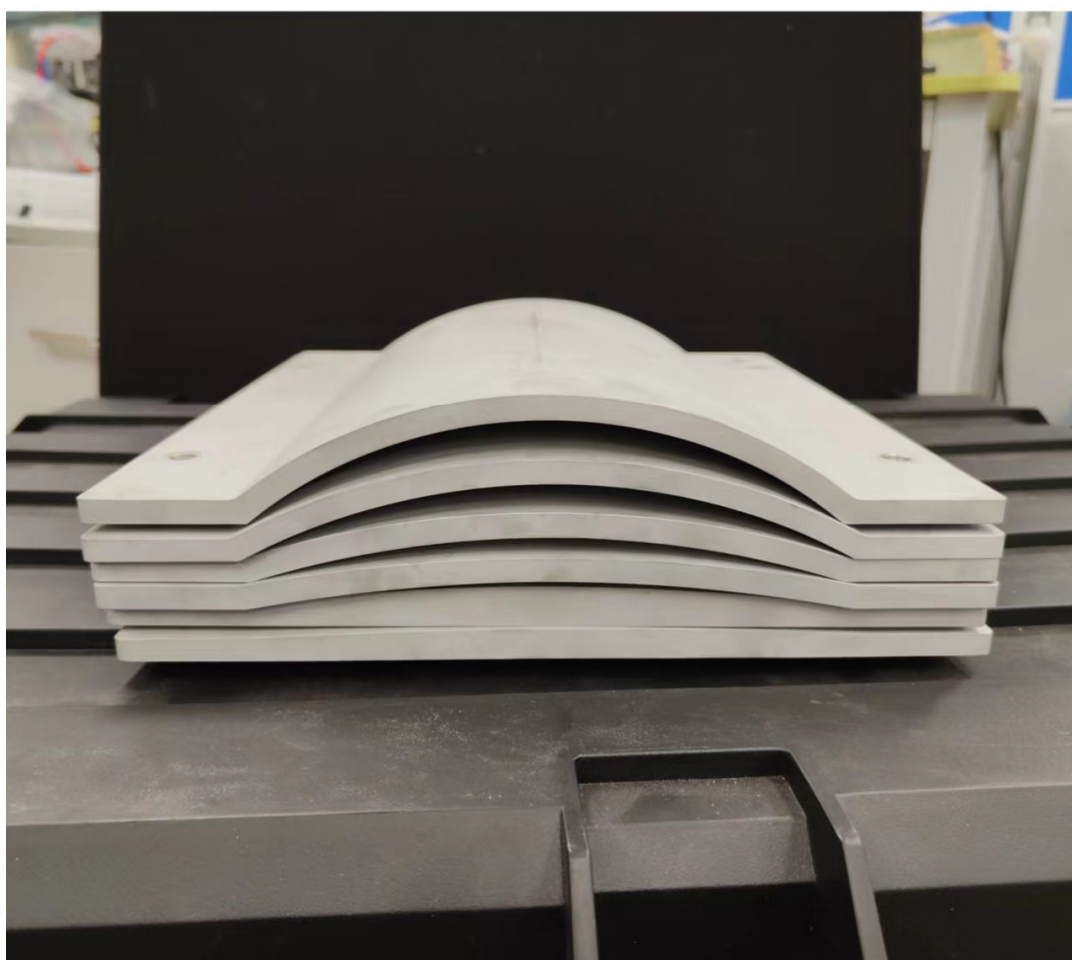

**Figure S1.** Photos of simulated bodies with different adsorption surfaces.

Supplement: s1 [file s1]
